# Supplementary material
Source: PubMed Central journal article supplement (PMC8786308)
Supplement: NIHMS1769671-supplement-1.pdf [file NIHMS1769671-supplement-1.pdf]

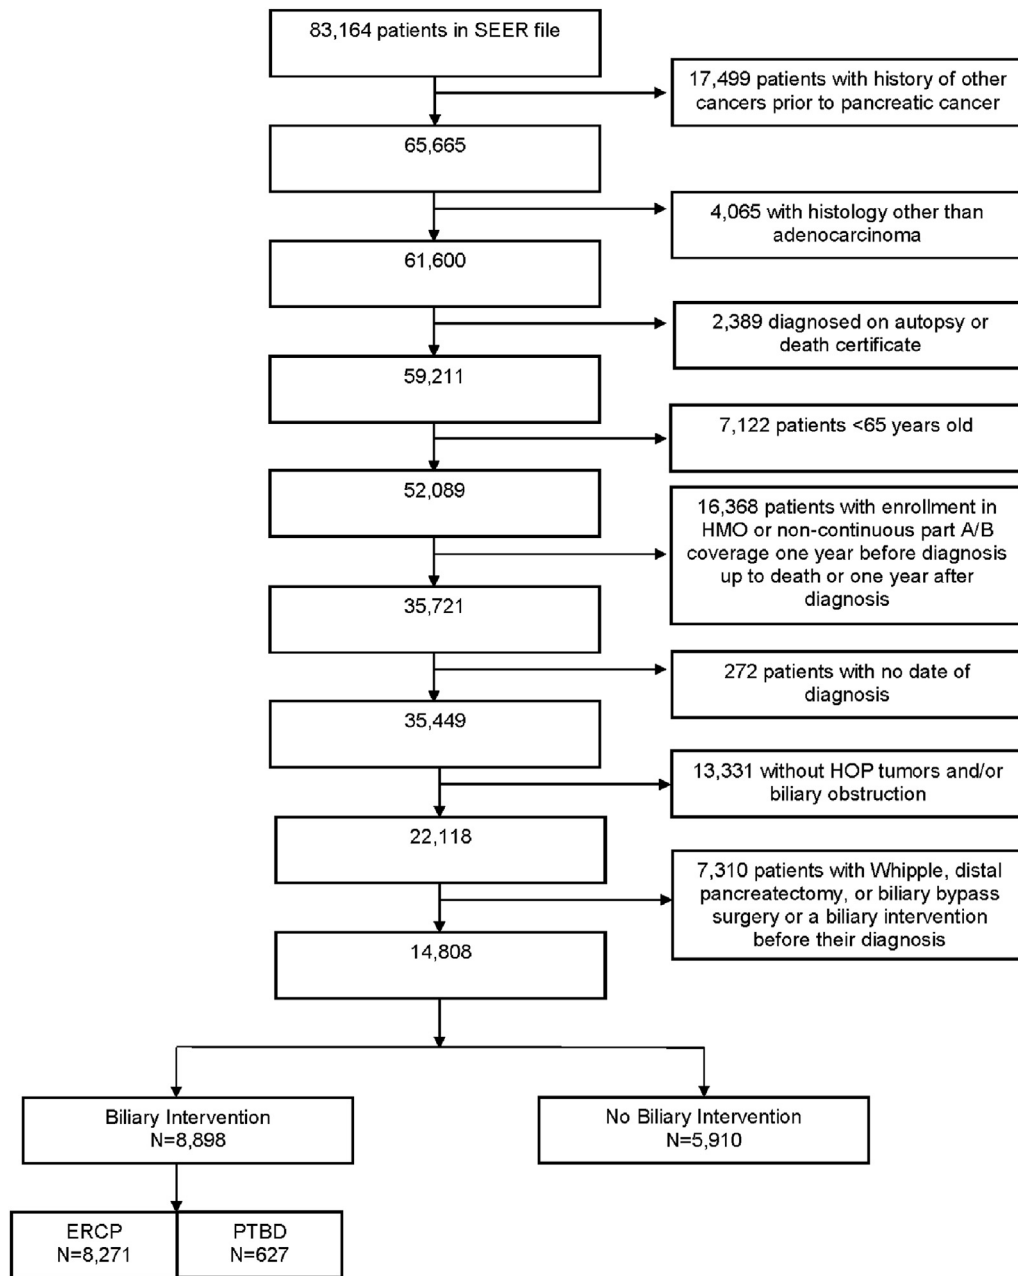

**Supplementary Figure 1.** Flowchart of Patient Cohort. *HMO*, Health maintenance organization; *HOP*, head of pancreas; *PTBD*, percutaneous transhepatic biliary drainage; *SEER*, Surveillance, Epidemiology, and End Results.

**SUPPLEMENTARY TABLE 1. Medicare and Surveillance, Epidemiology, and End Results Billing Codes**

| Variables                                                                    | Codes                                                                                                                                                                                                                                                                                                                                                                                                                                                                                                                                                                                                                                                                                                                                                                                                                                                                                                                                                                                                                                                                                                                                                                                                                                                                                                                                                                                                                   |
|------------------------------------------------------------------------------|-------------------------------------------------------------------------------------------------------------------------------------------------------------------------------------------------------------------------------------------------------------------------------------------------------------------------------------------------------------------------------------------------------------------------------------------------------------------------------------------------------------------------------------------------------------------------------------------------------------------------------------------------------------------------------------------------------------------------------------------------------------------------------------------------------------------------------------------------------------------------------------------------------------------------------------------------------------------------------------------------------------------------------------------------------------------------------------------------------------------------------------------------------------------------------------------------------------------------------------------------------------------------------------------------------------------------------------------------------------------------------------------------------------------------|
| Pancreatic adenocarcinoma (ICD-0-3 codes for histology of pancreatic cancer) | 8000-5, 8010-15, 8020-22, 8050-55, 8140, 8211, 8230, 8260-63, 8440, 8450-53, 8470-71, 8480-81, 8500, 8503, 8521, 8570                                                                                                                                                                                                                                                                                                                                                                                                                                                                                                                                                                                                                                                                                                                                                                                                                                                                                                                                                                                                                                                                                                                                                                                                                                                                                                   |
| ERCP (HCPCS and ICD-9 procedure codes)                                       | 43260-65, 43271-72, 74328, 74329, 74330, 43267-69, 43274, 43276, 5110, 5111, 5184- 87, 5199, 5213, 5293                                                                                                                                                                                                                                                                                                                                                                                                                                                                                                                                                                                                                                                                                                                                                                                                                                                                                                                                                                                                                                                                                                                                                                                                                                                                                                                 |
| PTBD (HCPCS and ICD-9 procedure codes)                                       | 47505, 47510, 47511, 47525, 75980, 74320, 47533, 47534, 47535, 47536, 47538, 47539, 47540, 8751, 5198                                                                                                                                                                                                                                                                                                                                                                                                                                                                                                                                                                                                                                                                                                                                                                                                                                                                                                                                                                                                                                                                                                                                                                                                                                                                                                                   |
| Jaundice (ICD-9)                                                             | 7824                                                                                                                                                                                                                                                                                                                                                                                                                                                                                                                                                                                                                                                                                                                                                                                                                                                                                                                                                                                                                                                                                                                                                                                                                                                                                                                                                                                                                    |
| Obstructive faundice (ICD-9)                                                 | 5768                                                                                                                                                                                                                                                                                                                                                                                                                                                                                                                                                                                                                                                                                                                                                                                                                                                                                                                                                                                                                                                                                                                                                                                                                                                                                                                                                                                                                    |
| Obstruction of the bile duct (ICD-9)                                         | 5762                                                                                                                                                                                                                                                                                                                                                                                                                                                                                                                                                                                                                                                                                                                                                                                                                                                                                                                                                                                                                                                                                                                                                                                                                                                                                                                                                                                                                    |
| Abnormal liver function tests (ICD-9)                                        | 7948                                                                                                                                                                                                                                                                                                                                                                                                                                                                                                                                                                                                                                                                                                                                                                                                                                                                                                                                                                                                                                                                                                                                                                                                                                                                                                                                                                                                                    |
| Cholangitis (ICD-9)                                                          | 5761                                                                                                                                                                                                                                                                                                                                                                                                                                                                                                                                                                                                                                                                                                                                                                                                                                                                                                                                                                                                                                                                                                                                                                                                                                                                                                                                                                                                                    |
| Gastric outlet obstruction (ICD-9)                                           | 5370                                                                                                                                                                                                                                                                                                                                                                                                                                                                                                                                                                                                                                                                                                                                                                                                                                                                                                                                                                                                                                                                                                                                                                                                                                                                                                                                                                                                                    |
| Whipple (HCPCS and ICD-9 procedure code)                                     | 48150, 48152, 48153, 48154, 48155, 527, 5251                                                                                                                                                                                                                                                                                                                                                                                                                                                                                                                                                                                                                                                                                                                                                                                                                                                                                                                                                                                                                                                                                                                                                                                                                                                                                                                                                                            |
| Biliary obstruction (ICD-9)                                                  | 5768, 7824, 5761, 5762, 7948, 6989                                                                                                                                                                                                                                                                                                                                                                                                                                                                                                                                                                                                                                                                                                                                                                                                                                                                                                                                                                                                                                                                                                                                                                                                                                                                                                                                                                                      |
| Pruritus (ICD-9)                                                             | 6989                                                                                                                                                                                                                                                                                                                                                                                                                                                                                                                                                                                                                                                                                                                                                                                                                                                                                                                                                                                                                                                                                                                                                                                                                                                                                                                                                                                                                    |
| Chemotherapy (ICD-9 procedure, ICD-9 diagnosis, and HCPCS codes)             | C1086, C1166, C1167, C1178, C9012, C9110, C9127, C9205, C9207, C9213, C9214, C9215, C9217, C9218, C9235, C9257, C9262, C9414, C9415, C9417, C9418, C9419, C9420, C9421, C9422, C9423, C9424, C9425, C9426, C9427, C9429, C9431, C9432, C9433, C9437, C9440, J0594, J0894, J8510, J8520, J8521, J8530, J8560, J8565, J8600, J8610, J8700, J8705, J9000, J9001, J9010, J9017, J9020, J9025, J9027, J9033, J9035, J9040, J9041, J9045, J9050, J9055, J9060, J9062, J9065, J9070, J9080, J9090, J9091, J9092, J9065, J9070, J9080, J9090, J9091, J9092, J9093, J9094, J9095, J9096, J9097, J9098, J9100, J9110, J9120, J9130, J9140, J9150, J9151, J9170, J9171, J9178, J9180, J9181, J9182, J9185, J9190, J9200, J9201, J9206, J9207, J9208, J9211, J9230, J9245, J9250, J9260, J9261, J9263, J9264, J9265, J9266, J9268, J9270, J9280, J9290, J9291, J9293, J9300, J9305, J9307, J9310, J9315, J9320, J9328, J9330, J9340, J9350, J9351, J9355, J9357, J9360, J9370, J9375, J9380, J9390, J9399, Q2017, Q2024, S0087, S0088, S0115, S0116, S0172, SS0176, SS0178, S0182, C8954, C8955, G0355, G0357, G0359, G0360, G0361, G0362, G0370, J7150, Q0083, Q0084, Q0085, S5019, S5020, S9329, S9330, S9331, S9425, C9419, C9420, C9421, C9422, C9423, C9424, C9425, C9426, C9427, C9429, C9431, C9432, C9433, C9437, C9440, J0594, J0894, 0010, 1770, 0519F, 36823, 51720, 61517, 95990, 95991, 96500, 96549, 9925, 9928, V581 |
| Radiation (ICD-9 and HCPCS)                                                  | 77520, 77523, 76370, 76950, C1325, C1348, C1350, C1728, C2616, C2632, C2633, C9714, C9715, G0174, G0178, G0179, G0261, G0256, G0273, G0274, 77621, 77299, 77750, 77799, C1700, C1712, C1715, C1720, C1790, C1806, G0338, G0340, V581, V671, 9221-9229                                                                                                                                                                                                                                                                                                                                                                                                                                                                                                                                                                                                                                                                                                                                                                                                                                                                                                                                                                                                                                                                                                                                                                   |

ICD, International Classification of Diseases; HCPCS, health care common procedure codes; PTBD, percutaneous transhepatic biliary drainage.

**SUPPLEMENTARY TABLE 2. Subgroup analysis among unresectable pancreatic cancer patients receiving ERCP compared with PTBD**

| <b>Subgroup analysis</b>                                                           | <b>Adjusted hazard ratio<br/>(95% confidence interval)*</b> |
|------------------------------------------------------------------------------------|-------------------------------------------------------------|
| Stage IV disease only (n = 2871)                                                   | .75 (.63-.91)                                               |
| Stage III and Stage IV disease only (n = 3626)                                     | .77 (.65-.91)                                               |
| Treated with chemotherapy and/or radiation (n = 4145)                              | .81 (.66-.99)                                               |
| Biliary obstruction without abnormal liver function tests† (n = 7933)              | .62 (.55-.70)                                               |
| Biliary obstruction treated with chemotherapy and/or radiation (n = 3460)          | .73 (.58-.93)                                               |
| Multiple ERCP or PTBD without switching to alternative biliary modality (n = 2767) | .51 (.41-.66)                                               |
| Survival >30 days (n = 8232)                                                       | .68 (.60-.76)                                               |
| Head of pancreas mass‡ (n = 7010)                                                  | .70 (.61-.79)                                               |
| No biliary obstruction (n = 855)                                                   | .97 (.69-1.4)                                               |

PTBD, Percutaneous transhepatic biliary drainage.

\*Hazard ratio for ERCP compared with PTBD.

†Biliary obstruction without abnormal liver function tests, defined as jaundice, obstructive jaundice, obstruction bile duct, pruritus, and cholangitis.

‡Patients with head of pancreas mass with or without evidence of biliary obstruction.

**SUPPLEMENTARY TABLE 3. Subgroup analysis among unresectable pancreatic cancer patients receiving either ERCP or PTBD compared with no biliary intervention**

| <b>Subgroup analysis (treatment = ERCP or PTBD)</b>                                | <b>Adjusted hazard ratio*<br/>(95% confidence interval)</b> |
|------------------------------------------------------------------------------------|-------------------------------------------------------------|
| Stage IV disease only (n = 6031)                                                   |                                                             |
| ERCP                                                                               | .50 (.46-.55)                                               |
| PTBD                                                                               | .43 (.36-.52)                                               |
| Stages III and IV disease only (n = 7135)                                          |                                                             |
| ERCP                                                                               | .48 (.44-.52)                                               |
| PTBD                                                                               | .43 (.37-.50)                                               |
| Treated with chemotherapy and/or radiation (n = 5987)                              |                                                             |
| ERCP                                                                               | .67 (.61-.73)                                               |
| PTBD                                                                               | .56 (.47-.68)                                               |
| Biliary obstruction without abnormal liver function tests† (n = 10,073)            |                                                             |
| ERCP                                                                               | .44 (.41-.47)                                               |
| PTBD                                                                               | .44 (.39-.49)                                               |
| Biliary obstruction treated with chemotherapy and/or radiation (n = 3803)          |                                                             |
| ERCP                                                                               | .68 (.59-.80)                                               |
| PTBD                                                                               | .65 (.50-.86)                                               |
| Multiple ERCP or PTBD without switching to alternative biliary modality (n = 8663) |                                                             |
| ERCP                                                                               | .32 (.29-.34)                                               |
| PTBD                                                                               | .26 (.22-.32)                                               |
| Survival >30 days (n = 12,871)                                                     |                                                             |
| ERCP                                                                               | .59 (.56-.63)                                               |
| PTBD                                                                               | .61 (.54-.68)                                               |
| Head of pancreas mass‡ (n = 11,073)                                                |                                                             |
| ERCP                                                                               | .54 (.51-.58)                                               |
| PTBD                                                                               | .53 (.47-.60)                                               |
| No biliary obstruction (n = 3850)                                                  |                                                             |
| ERCP                                                                               | .52 (.47-.57)                                               |
| PTBD                                                                               | .40 (.31-.51)                                               |

PTBD, Percutaneous transhepatic biliary drainage.

\*Hazard ratio comparing ERCP and PTBD with no biliary intervention.

†Group includes those with biliary obstruction, defined as jaundice, obstructive jaundice, obstruction bile duct, pruritus, and cholangitis.

‡Patients with head of pancreas mass with or without evidence of biliary obstruction.
